# Supplementary material
Source: ML conference proceedings conference paper supplement (https://proceedings.neurips.cc/paper_files/paper/2019/hash/30d411fdc0e6daf092a74354094359bb-Abstract.html)
Supplement: Supplementary file [file 30d411fdc0e6daf092a74354094359bb-Supplemental.zip]

---

# Learning to Screen

---

Anonymous Author(s)

Affiliation

Address

email

## Abstract

Imagine a large firm with multiple departments that plans a large recruitment. Candidates arrive one-by-one, and for each candidate the firm decides, based on her data (CV, skills, experience, etc), whether to summon her for an interview. The firm wants to recruit the best candidates while minimizing the number of interviews. We model such scenarios as an assignment problem between items (candidates) and categories (departments): the items arrive one-by-one in an online manner, and upon processing each item the algorithm decides, based on its value and the categories it can be matched with, whether to retain or discard it (this decision is irrevocable). The goal is to retain as few items as possible while guaranteeing that the set of retained items contains an optimal matching.

We consider two variants of this problem: (i) in the first variant it is assumed that the  $n$  items are drawn independently from an unknown distribution  $D$ . (ii) In the second variant it is assumed that before the process starts, the algorithm has an access to a training set of  $n$  items drawn independently from the same unknown distribution (e.g. data of candidates from previous recruitment seasons). We give tight bounds on the minimum possible number of retained items in each of these variants. These results demonstrate that one can retain exponentially less items in the second variant (with the training set).

Our algorithms and analysis utilize ideas and techniques from statistical learning theory and from discrete algorithms.

## 1 Introduction

Matching is the bread-and-butter of many real-life problems from the fields of computer science, operations research, game theory, and economics. Some examples include job scheduling where we assign jobs to machines, economic markets where we allocate products to buyers, online advertising where we assign advertisers to ad slots, assigning medical interns to hospitals, and many more.

One particular example that motivates this work is the following example from labor markets. Imagine a firm that is planning a large recruitment. Candidates arrive one-by-one and the HR department immediately decides whether to summon them for an interview. Moreover, the firm has multiple departments, each requiring different skills and having a different target number of hires. Different employees have different subsets of the required skills, and thus fit only certain departments and with a certain quality. The firm's HR department, following the interviews, decides which candidates to recruit and to which departments to assign them. The HR department has to maximize the total quality of the hired employees such that each department gets its required number of hires with the required skills. In addition, the HR uses data from the previous recruitment season in order to minimize the number of interviews while not compromising the quality of the solution.

36 We study the following formulation of the problem above. We receive  $n$  items (candidates), where  
 37 each item has a subset of  $d$  properties (departments) denoted by  $P_1, \dots, P_d$ . We select  $k$  items out of  
 38 the  $n$ , subject to  $d$  constraints of the form

39 
$$\text{exactly } k_i \text{ of the selected items must satisfy a property } P_i,$$

40 where  $\sum_{i=1}^d k_i = k$  and we assume that  $d \ll k \ll n$ . Furthermore, if item  $c$  possesses property  $P_i$ , then  
 41 it has a value  $v_i(c)$  associated with this property. Our goal is to compute a matching of maximum  
 42 value that associates  $k$  items to the  $d$  properties subject to the constraints above.

43 We consider matching algorithms in the following online setting. The algorithms receive  $n$  items  
 44 online, drawn independently from  $D$ , and either reject or retain each item. Then, the algorithm  
 45 utilizes the retained items and outputs an (approximately-)optimal feasible solution. We present a  
 46 naive greedy algorithm that returns the optimal solution with probability at least  $1 - \delta$  and retains  
 47  $O(k \log(k/\delta))$  items in expectation. We prove that no other algorithm with the same guarantee can  
 48 retain less items in expectation.

49 Thus, to further reduce the number of retained items, we add an initial preprocessing phase in which  
 50 the algorithm learns an online policy from a *training set*. The training set is a single problem instance  
 51 that consists of  $n$  items drawn independently from the same unknown distribution  $D$ . We address  
 52 the statistical aspects of this problem and develop efficient learning algorithms. In particular, we  
 53 define a class of *thresholds-policies*. Each thresholds-policy is a simple rule for deciding whether  
 54 to retain an item. We present uniform convergence rates for both the number of items retained by a  
 55 thresholds policy and the value of the resulting solution. We show that these quantities deviate from  
 56 their expected value by order of  $\sqrt{k}$  (rather than an easier  $\sqrt{n}$  bound; recall that we assume  $k \ll n$ )  
 57 which we prove using concentration inequalities and tools from VC-theory. Using these concentration  
 58 inequalities, we analyze an efficient online algorithm that returns the optimal offline solution with  
 59 probability at least  $1 - \delta$ , and retains a near-optimal  $O(k \log \log(1/\delta))$  number of items in expectation  
 60 (compare with the  $O(k \log(k/\delta))$  number of retained items when no training set is given).

61 **Related work.** Our model is related to the online secretary problem in which one needs to select  
 62 the best secretary in an online manner (see Ferguson, 1989). Our setting differs from this classical  
 63 model due to the two-stage process and the complex feasibility constraints. Nonetheless, we remark  
 64 that there are few works on the secretary model that allow delayed selection (see Vardi, 2015, Ezra  
 65 et al., 2018) as well as matroid constraints [Babaioff et al., 2007]. These works differ from ours in  
 66 the way the decision is made, the feasibility constraints and the learning aspect of receiving a single  
 67 problem instance as a training example.

68 Another related line of work in algorithmic economics studies the statistical learnability of pricing  
 69 schemes (see e.g., Morgenstern and Roughgarden, 2015, 2016, Hsu et al., 2016, Balcan et al., 2018).  
 70 The main difference of these works from ours is that our training set consists of a single “example”  
 71 (namely the set of items that are used for training), and in their setting (as well as in most typical  
 72 statistical learning settings) the training set consists of many i.i.d examples. This difference also affects  
 73 the technical tools used for obtaining generalization bounds. For example, some of our bounds exploit  
 74 Talagrand’s concentration inequality rather than the more standard Chernoff/McDiarmid/Bernstein  
 75 inequalities. We note that Talagrand’s inequality and other advanced inequalities were applied in  
 76 machine learning in the context of learning combinatorial functions [Vondrák, 2010, Blum et al.,  
 77 2017]. See also the survey by Bousquet et al. [2004] or the book by Boucheron et al. [2013] for a  
 78 more thorough review of concentration inequalities.

79 Furthermore, there is a large body of work on online matching in which the vertices arrive in various  
 80 models (see Mehta et al., 2013, Gupta and Molinaro, 2016). We differ from this line of research, by  
 81 allowing a two-stage algorithm, and requiring to output the optimal matching is the second stage.

82 Celis et al. [2017, 2018] studies similar problems of ranking and voting with fairness constraints. In  
 83 fact, the optimization problem that they consider allows more general constraints and the value of a  
 84 candidate is determined from votes/comparisons. The main difference with our framework is that  
 85 they do not consider a statistical setting (i.e. there is no distribution over the items and no training set  
 86 for preprocessing) and focus mostly on approximation algorithms for the optimization problem.

## 87 2 Model and Results

88 Let  $X$  be a domain of items, where each item  $c \in X$  can possess any subset of  $d$  properties denoted  
 89 by  $P_1, \dots, P_d$  (we view  $P_i \subseteq X$  as the set of items having property  $P_i$ ). Each item  $c$  has a value  
 90  $v_i(c) \in [0, 1]$  associated with each property  $P_i$  such that  $c \in P_i$ .

91 We are given a set  $C \subseteq X$  of  $n$  items as well as counts  $k_1, \dots, k_d$  such that  $\sum_{i=1}^d k_i = k$ . Our goal is to  
 92 select exactly  $k$  items in total, constrained on selecting exactly  $k_i$  items with property  $P_i$ . We assume  
 93 that these constraints are *exclusive*, in the sense that each item in  $C$  can be used to satisfy at most  
 94 one of the constraints. Formally, a feasible solution is a subset  $S \subseteq C$ , such that  $|S| = k$  and there is  
 95 partition  $S$  into  $d$  disjoint subsets  $S_1, \dots, S_d$ , such that  $S_i \subseteq P_i$  and  $|S_i| = k_i$ . We aim to compute a  
 96 feasible subset  $S$  that maximizes  $\sum_{i=1}^d \sum_{c \in S_i} v_i(c)$ .

97 Furthermore, we assume that  $d \ll k \ll n$ . Namely, the number of constraints is much smaller than  
 98 the number of items that we have to select, which is much smaller than the total number of items  
 99 in  $C$ . In order to avoid feasibility issues we assume that there is a set  $C_{\text{dummy}}$  that contains  $k$  dummy  
 100 0-value items with all the  $d$  properties (we assume that the algorithm has always access to  $C_{\text{dummy}}$   
 101 and do not view them as part of  $C$ ).

102 **Formulation as bipartite matching.** We first discuss the offline versions of these allocation prob-  
 103 lems. That is, we assume that  $C$  and the capacities  $k_i$  are all given as an input before the algorithm  
 104 starts. We are interested in an algorithm for computing an optimal set  $S$ . That is a set of items of  
 105 maximum total value that satisfy the constraints. This problem is equivalent to a maximum matching  
 106 problem in a bipartite graph  $(L, R, E, w)$  defined as follows.

- 107 •  $L$  is the set of vertices in one side of the bipartite graph. It contains  $k$  vertices, where each  
 108 constraint  $i$  is represented by  $k_i$  of these vertices.
- 109 •  $R$  is the set of vertices in the other side of the bipartite graph. It contains a vertex for each  
 110 item  $c \in C$  and for each dummy item  $c' \in C_{\text{dummy}}$ .
- 111 •  $E$  is the set of edges. Each vertex in  $R$  is connected to each vertex of each of the constraints  
 112 that it satisfies.
- 113 • The weight  $w(l, r)$  of edge  $(l, r) \in E$  is  $v_l(r)$ : the value of item  $r$  associated with property  $P_l$ .

114 There is a natural correspondence between *saturated-matchings* in this graph, that is matchings  
 115 in which every  $l \in L$  is matched, and between *feasible solutions* (i.e., solutions that satisfy the  
 116 constraints) to the allocation problem. Thus, a saturated-matching of maximum value corresponds to  
 117 an optimal solution. It is well known that the problem of finding such a maximum weight bipartite  
 118 matching can be solved in polynomial time (see e.g., Lawler, 2001).

119 **Problem definition.** In this work we consider the following online learning model. We assume  
 120 that  $n$  items are sequentially drawn i.i.d. from an unknown distribution  $D$  over  $X$ . Upon receiving  
 121 each item, we decide whether to retain it, or reject it irrevocably (the first stage of the algorithm).  
 122 Thereafter, we select a feasible solution<sup>1</sup> consisting *only* of retained items (the second stage of the  
 123 algorithm). Most importantly, before accessing the online sequence and take irreversible online  
 124 decisions of which items to reject, we have access a training set  $C_{\text{train}}$  consisting of  $n$  independent  
 125 draws from  $D$ .

## 126 2.1 Results

### 127 2.1.1 Oblivious online screening

128 We begin by studying a greedy algorithm that does not require a training set. In the online phase,  
 129 this algorithm acts greedily by keeping an item if it participates in the best solution thus far. Then,  
 130 the algorithm computes an optimal matching among the retained items. The particular details of the  
 131 algorithm are given in Appendix A.1. We have the following guarantee for this greedy algorithm  
 132 proven in Appendix A.1.

---

<sup>1</sup>In addition to the retained items, the algorithm has access to  $C_{\text{dummy}}$ , and therefore a feasible solution always exists.

**Theorem 1.** Let  $\delta \in (0, 1)$ . The greedy algorithm outputs the optimal solution with probability at least  $1 - \delta$  and retains  $O(k \log(\min\{k/\delta, n/k\}))$  items in expectation.

As we shall see in the next section, learning from the training set allows one to retain exponentially less items than is implied by the theorem above. It is then natural to ask to which extent is the training phase essential in order to accommodate such an improvement. We answer this question in Appendix B.1 by proving a lower bound on the number of retained items for *any* algorithm that does not use a training phase. This lower bound already applies in the simple setting where  $d = 1$ : here, each item consists only of a value  $v \in [0, 1]$ , and the goal of the algorithm is to retain as few items as possible while guaranteeing with high probability that the top  $k$  maximal values are retained.

**Theorem 2.** Let  $\delta \in (0, 1)$ . For every algorithm  $A$  which retains the maximal  $k$  elements with probability at least  $1 - \delta$ , there exists a distribution  $\mu$  such that the expected number of retained elements for input sequences  $v_1 \dots v_n \sim \mu^n$  is at least  $\Omega(k \log(\min\{k/\delta, n/k\}))$ .

Thus, the above theorem implies that  $\Theta(k \log(n/k))$  can not be improved even if we allow failure probability  $\delta = \Theta(k^2/n)$  (see Theorem 1).

### 2.1.2 Online screening with learning

We now design online algorithms that, before the online screening process begins, use  $C_{\text{train}}$  to learn a *thresholds-policy*  $T \in \mathcal{T}$  such that with high probability: (i) the number of items that are retained in the online phase is small, and (ii) there is a feasible solution consisting of  $k$  retained items whose value is optimal (or close to optimal). Thresholds-policies are studied in Section 3 and are defined as follows.

**Definition 3** (Thresholds-policies). A threshold-policy is parametrized by a vector  $T = (t_1, \dots, t_d)$  of thresholds, where  $t_i$  corresponds to property  $P_i$  for  $1 \leq i \leq d$ . The semantics of  $T$  is as follows: given a sample  $C$  of  $n$  items, each item  $c \in C$  is retained if and only if there exists a property  $P_i$  satisfied by  $c$ , such that its value  $v_i(c)$  passes the threshold  $t_i$ . More formally,  $c$  is retained if and only if  $\exists i \in \{1, \dots, d\}$  such that  $c \in P_i$  and  $v_i(c) \geq t_i$ .

Having proven uniform convergence results for thresholds-policies (see Section 3.1), we show the following in Section 4.

**Theorem 4.** There exists an algorithm that learns a thresholds-policy  $T$  from a single training sample  $C_{\text{train}} \sim D^n$ , such that after processing the (“real-time”) input sample  $C \sim D^n$  using  $T$ :

- It outputs an optimal solution with probability at least  $1 - \delta$ .
- The expected number of retained items in the first phase is  $O(k(\log d + \log \log(n/k) + \log \log(1/\delta)))$ .

Thus, with the additional information given by the training set, the algorithm presented in Theorem 4 improves the number of retained items from  $k \log(k/\delta)$  to  $k \log \log(1/\delta)$ . This demonstrates a significant improvement over Theorem 1.

Finally, in Appendix B.2 we prove that the algorithm from Theorem 4 is nearly-optimal in the sense that it is impossible to significantly improve the number of retained items even if we allow the algorithm to fully know the distribution over input items (so, in a sense, having an access to  $n$  i.i.d samples from the distribution is the same as knowing it completely).

**Theorem 5.** Consider the case where  $k = d$  and  $k_1 = \dots k_d = 1$ . There exists a universe  $X$  and a fixed distribution  $D$  over  $X$  such that for  $C \sim D^n$  the following holds: any online learning algorithm (which possibly “knows”  $D$ ) that retains a subset  $S \subseteq C$  of items that contains an optimal solution with probability at least  $1 - \delta$  must satisfy that  $\mathbb{E}x[|S|] = \Omega(k \log \log(1/\delta))$ .

## 3 Thresholds-policies

We next discuss a framework to design algorithms that exploit the training set to learn policies that are applied in the first phase of the matching process. We would like to frame this in standard ML formalism by phrasing this problem as learning a class  $\mathcal{H}$  of policies such that:

- **$\mathcal{H}$  is not too small:** The policies in  $\mathcal{H}$  should yield solutions with high values (optimal, or near-optimal).
- **$\mathcal{H}$  is not too large:**  $\mathcal{H}$  should satisfy some uniform convergence properties; i.e. the performance of each policy in  $\mathcal{H}$  on the training set is close, with high probability, to its expected real-time performance on the sampled items during the online selection process.

Indeed, as we now show these demands are met by the class  $\mathcal{T}$  of thresholds policies (Definition 3). We first show that the class of thresholds-policies contains an optimal policy, and in the sequel we show that it satisfies attractive uniform convergence properties.

**An assumption (values are unique).** We assume that for each constraint  $P_i$ , the marginal distribution over the value of  $c \sim D$  conditioned on  $c \in P_i$  is atomless; namely  $\Pr_{c \sim D}[v(c) = v \mid c \in P_i] = 0$  for every  $v \in [0, 1]$ . This assumption can be removed by adding artificial tie-breaking rules, but making it will simplify some of the technical statements.

**Theorem 6** (There is a thresholds policy that retains an optimal solution). *For any set of items  $C$ , there exists a thresholds vector  $T \in \mathcal{T}$  that retains exactly  $k$  items that form an optimal solution for  $C$ .*

*Proof.* Let  $S$  denote the set of  $k$  items in an optimal solution for  $C$ , and let  $S_i \subseteq S \cap P_i$  be the subset of  $M$  that is assigned to the constraint  $P_i$ . Define  $t_i = \min_{c \in S_i} v_i(c)$ , for  $i \geq 1$ . Clearly,  $T$  retains all the items in  $S$ . Assume towards contradiction that  $T$  retains an item  $c_j \notin S$ , and assume that  $P_i$  is a constraint such that  $c_j \in P_i$  and  $v_i(c_j) \geq t_i$ . Since by our assumption on  $D$  all the values  $v_i(c_j)$  are distinct it follows that  $v_i(c_j) > t_i$ . Thus, we can modify  $S$  by replacing  $c_j$  with the item of minimum value in  $S_i$  and increase the total value. This contradicts the optimality of  $S$ .  $\square$

We next establish generalization bounds for the class of thresholds-policies.

### 3.1 Uniform convergence of the number of retained items

For a sample  $C \sim D^n$  and a thresholds-policy  $T \in \mathcal{T}$ , we denote by  $R_i^T(C) = \{c : c \in P_i \text{ and } v_i(c) \geq t_i\}$  the set of items that are retained by the threshold  $t_i$ , and we denote its expected size by  $\rho_i^T = \mathbb{E}_{C \sim D^n}[|R_i^T(C)|]$ . Similarly we denote by  $R^T(C) = \cup_i R_i^T(C)$  the items retained by  $T$ , and by  $\rho^T$  its expectation. We prove that the sizes of  $R_i^T(C)$  and  $R^T(C)$  are concentrated around their expectations uniformly for all thresholds policies.

The following theorems establish uniform convergence results for the number of retained items. Namely, with high probability we have  $R_i^T \approx \rho_i^T$ ,  $R^T \approx \rho^T$  simultaneously for all  $T \in \mathcal{T}$  and  $i \leq d$ .

**Theorem 7** (Uniform convergence of the number of retained items). *With probability at least  $1 - \delta$  over  $C \sim D^n$ , the following holds for all policies  $T \in \mathcal{T}$  simultaneously:*

1. If  $\rho^T \geq k$ , then  $(1 - \epsilon)\rho^T \leq |R^T(C)| \leq (1 + \epsilon)\rho^T$ , and
2. if  $\rho^T < k$ , then  $\rho^T - \epsilon k \leq |R^T(C)| \leq \rho^T + \epsilon k$ ,

where

$$\epsilon = O\left(\sqrt{\frac{d \log(d) \log(n/k) + \log(1/\delta)}{k}}\right).$$

**Theorem 8** (Uniform convergence of the number of retained items per constraint). *With probability at least  $1 - \delta$  over  $C \sim D^n$ , the following holds for all policies  $T \in \mathcal{T}$  and all  $i \leq d + 1$  simultaneously:*

1. If  $\rho_i^T \geq k$ , then  $(1 - \epsilon)\rho_i^T \leq |R_i^T(C)| \leq (1 + \epsilon)\rho_i^T$ , and
2. if  $\rho_i^T < k$ , then  $\rho_i^T - \epsilon k \leq |R_i^T(C)| \leq \rho_i^T + \epsilon k$ ,

where

$$\epsilon = O\left(\sqrt{\frac{\log(d) \log(n/k) + \log(1/\delta)}{k}}\right).$$

219 The proofs of Theorems 7 and 8 are based on standard VC-based uniform convergence results, and  
 220 technically the proof boils down to bounding the VC-dimension of the families

$$\mathcal{R} = \{R^T : T \in \mathcal{T}\} \quad \text{and} \quad \mathcal{Q} = \{R_i^T : T \in \mathcal{T}, i \leq d\}.$$

221 Indeed, in Appendix A.2 we prove the following.

222 **Lemma 9.**  $VC(\mathcal{R}) = O(d \log d)$ .

223 **Lemma 10.**  $VC(\mathcal{Q}) = O(\log d)$ .

224 Using Lemmas 9 and 10, we can now apply standard uniform convergence results from VC-theory to  
 225 derive Theorems 7 and 8.

226 **Definition 11** (Relative  $(p, \epsilon)$ -approximation; Har-Peled and Sharir, 2011). Let  $\mathcal{F}$  be a family of  
 227 subsets over a domain  $X$ , and let  $\mu$  be a distribution on  $X$ .  $Z \subseteq X$  is a  $(p, \epsilon)$ -approximation for  $\mathcal{F}$  if  
 228 for each  $f \in \mathcal{F}$  we have,

229 1. If  $\mu(f) \geq p$ , then  $(1 - \epsilon)\mu(f) \leq \hat{\mu}(f) \leq (1 + \epsilon)\mu(f)$ ,

230 2. If  $\mu(f) < p$ , then  $\mu(f) - \epsilon p \leq \hat{\mu}(f) \leq \mu(f) + \epsilon p$ ,

231 where  $\hat{\mu}(f) = |Z \cap F|/|Z|$  is the (“empirical”) measure of  $f$  with respect to  $Z$ .

232 The proof of Theorems 7 and 8 now follows by plugging  $p = k/n$  in Har-Peled and Sharir [2011,  
 233 Theorem 2.11], which we state in the next proposition.

234 **Proposition 12** (Har-Peled and Sharir, 2011). *Let  $\mathcal{F}$  and  $\mu$  like in Definition 11. Suppose  $\mathcal{F}$  has VC*  
 235 *dimension  $m$ . Then, with provability at least  $1 - \delta$ , a random sample of size*

$$\Omega\left(\frac{m \log(1/p) + \log(1/\delta)}{\epsilon^2 p}\right)$$

236 *is a relative  $(p, \epsilon)$ -approximation for  $\mathcal{F}$ .*

### 237 3.2 Uniform convergence of values

238 We now prove a concentration result for the value of an optimal solution among the retained items.  
 239 Unlike the number of retained items, the value of an optimal solution corresponds to a more complex  
 240 random variable, and analyzing the concentration of its empirical estimate requires more advanced  
 241 techniques.

242 We denote by  $V^T(C)$  the value of the optimal solution among the items retained by the thresholds-  
 243 policy  $T$ , and we denote its expectation by  $v^T = \mathbb{E}_{C \sim D^n} [V^T(C)]$ . We show that  $V^T(C)$  is concentrated  
 244 uniformly for all thresholds policies.

245 **Theorem 13** (Uniform convergence of values). *With probability at least  $1 - \delta$  over  $C \sim D^n$ , the*  
 246 *following holds for all policies  $T \in \mathcal{T}$  simultaneously:*

$$|v^T - V^T(C)| \leq \epsilon k, \quad \text{where} \quad \epsilon = O\left(\sqrt{\frac{d \log k + \log(1/\delta)}{k}}\right).$$

247 Note that unlike most uniform convergence results that guarantee simultaneous convergence of  
 248 empirical averages to expectations, here  $V^T(C)$  is not an average of the  $n$  samples, but rather a more  
 249 complicated function of them. We also note that a bound of  $\tilde{O}(\sqrt{n})$  (rather than  $\tilde{O}(\sqrt{k})$ ) on the additive  
 250 deviation of  $V^T(C)$  from its expectation can be derived using the McDiarmid’s inequality [McDiarmid,  
 251 1989]. However, this bound is meaningless when  $\sqrt{n} > k$  (because  $k$  upper bounds the value of the  
 252 optimal solution). We use Talagrand’s concentration inequality [Talagrand, 1995] to derive the  $O(\sqrt{k})$   
 253 upper bound on the additive deviation. Talagrand’s concentration inequality allows us to utilize the  
 254 fact that an optimal solution uses only  $k \ll n$  items, and therefore replacing an item that does not  
 255 participate in the solution does not affect its value.

256 To prove the theorem we need the following concentration inequality for the value of the optimal  
 257 selection in hindsight. Note that by Theorem 6 this value equals to  $V^T(C)$  for some  $T$ .

258 **Lemma 14.** *Let  $\text{OPT}(C)$  denote the value of the optimal solution for a sample  $C$ . We have that*

$$\Pr_{C \sim D^n} [|\text{OPT}(C) - \mathbb{E}[\text{OPT}(C)]| \geq \alpha] \leq 2 \exp(-\alpha^2/2k).$$

259 So, for example, it happens that  $|\text{OPT}(C) - \mathbb{E}[\text{OPT}(C)]| \leq \sqrt{2k \log(2/\delta)}$  with probability at least  
 260  $1 - \delta$ .

261 To prove this lemma we use the following version of Talagrand's inequality (that appears for example  
 262 in lecture notes by van Handel [2014]).

263 **Proposition 15** (Talagrand's Concentration Inequality). *Let  $f : \mathbb{R}^n \mapsto \mathbb{R}$  be a function, and suppose*  
 264 *that there exist  $g_1, \dots, g_n : \mathbb{R}^n \mapsto \mathbb{R}$  such that for any  $x, y \in \mathbb{R}^n$*

$$f(x) - f(y) \leq \sum_{i=1}^n g_i(x) 1_{[x_i \neq y_i]}. \quad (1)$$

265 Then, for independent random variables  $X = (X_1, \dots, X_n)$  we have

$$\Pr [|f(X) - \mathbb{E}[f(X)]| > \alpha] \leq 2 \exp \left( -\frac{\alpha^2}{2 \sup_x \sum_{i=1}^n g_i^2(x)} \right).$$

266 *Proof of Lemma 14.* We apply Talagrand's concentration inequality to the random variable  $\text{OPT}(C)$ .  
 267 Our  $X_i$ 's are the items  $c_1, \dots, c_n$  in the order that they are given. We show that Eq. (1) holds for  
 268  $g_i(C) = 1_{[c_i \in S]}$  where  $S = S(C)$  is a fixed optimal solution for  $C$  (we use some arbitrary tie breaking  
 269 among optimal solutions). We then have,  $\sum_{i=1}^n g_i^2(C) = |S| = k$ , thus completing the proof.

270 Now, let  $C, C'$  be two samples of  $n$  items. Recall that we need to show that

$$\text{OPT}(C) - \text{OPT}(C') \leq \sum_{i=1}^n g_i(C) 1_{[c_i \neq c'_i]}.$$

271 We use  $S$  to construct a solution  $S'$  for  $C'$  as follows. Let  $S_j \subseteq S$  the subset of  $S$  matched to  $P_j$ . For  
 272 each  $i$ , if  $c_i \in S_j$  for some  $j$ , and  $c_i = c'_i$ , then we add  $i$  to  $S'_j$ . Otherwise, we add a dummy item from  
 273  $C'_{\text{dummy}}$  to  $S'_j$  (with value zero). Let  $V(S')$  denote the value of  $S'$ . Note that the difference between  
 274 the values of  $S$  and  $S'$  is the total value of all items  $i \in S$  such that  $c_i \neq c'_i$ . Since the item values are  
 275 bounded in  $[0, 1]$  we get that

$$\text{OPT}(C) - V(S') = \sum_{j=1}^d \sum_{c_i \in S_j} v_j(c_i) 1_{[c_i \neq c'_i]} \leq \sum_{j=1}^d \sum_{c_i \in S_j} 1_{[c_i \neq c'_i]} = \sum_{i=1}^n g_i(C) 1_{[c_i \neq c'_i]}.$$

276 The proof is complete by noticing that  $\text{OPT}(C') \geq V(S')$ . □

277 We also require the following construction of a bracketing of  $\mathcal{T}$  which is formally presented in  
 278 Appendix A.2.

279 **Lemma 16.** *There exists a collection of  $\mathcal{N}$  thresholds-policies such that  $|\mathcal{N}| \leq k^{O(d)}$ , and for every*  
 280 *thresholds-policy  $T \in \mathcal{T}$  there are  $T^+, T^- \in \mathcal{N}$  such that*

281 1.  $V^{T^-}(C) \leq V^T(C) \leq V^{T^+}(C)$  for every sample of items  $C$ ; note that by taking expectations  
 282 this implies that  $\mathbf{v}^{T^-} \leq \mathbf{v}^T \leq \mathbf{v}^{T^+}$ , and

283 2.  $\mathbf{v}^{T^+} - \mathbf{v}^{T^-} \leq 10$ .

284 *Proof of Theorem 13.* The items in  $C$  that are retained by  $T$  are independent samples from a distri-  
 285 bution  $D'$  that is sampled as follows: (i) sample  $c \sim D$ , and (ii) if  $c$  is retained by  $T$  then keep it,  
 286 and otherwise discard it. This means that  $\mathbf{v}^T(C)$  is in fact the optimal solution of  $C$  with respect to  
 287  $D'$ . Since Lemma 14 applies to every distribution  $D$  we can apply it to  $D'$  and get that for any fixed  
 288  $T \in \mathcal{T}$

$$\Pr_{C \sim D^n} [|\mathbf{v}^T - V^T(C)| \geq \alpha] \leq 2 \exp(-\alpha^2/2k).$$

289 Now, by the union bound for  $\mathcal{N}$  be as in Lemma 16 we get that the probability that there is  $T \in \mathcal{N}$   
 290 such that  $|\mathbf{v}^T - V^T(C)| \geq \alpha$  is at most  $|\mathcal{N}| \cdot 2 \exp(-\alpha^2/2k)$ . Thus, since  $|\mathcal{N}| \leq k^{O(d)}$ , it follows that  
 291 with probability at least  $1 - \delta$ ,

$$(\forall T \in \mathcal{N}) : |\mathbf{v}^T - V^T(C)| \leq O\left(\sqrt{k(d \log k + \log(1/\delta))}\right). \quad (2)$$

292 We now show why uniform convergence for  $\mathcal{N}$  implies uniform convergence for  $\mathcal{T}$ . Combining  
 293 Lemma 16 with Equation (2) we get that with probability at least  $1 - \delta$ , every  $T \in \mathcal{T}$  satisfies:

$$\begin{aligned} |\mathbf{v}^T - V^T(C)| &\leq \max\{|\mathbf{v}^{T^+} - V^{T^+}(C)|, |\mathbf{v}^{T^-} - V^{T^-}(C)|\} && \text{(by Item 1 of Lemma 16)} \\ &\leq \max\{|\mathbf{v}^{T^-} - V^{T^-}(C)|, |\mathbf{v}^{T^+} - V^{T^+}(C)|\} + 10 && \text{(by Item 2 of Lemma 16)} \\ &\leq 10 + O\left(\sqrt{k(d \log k + \log(1/\delta))}\right). && \text{(by Eq. (2))} \end{aligned}$$

294 Here the first inequality follows from Item 1 by noticing that if  $[a, b]$ ,  $[c, d]$  are intervals on the real  
 295 line and  $x \in [a, b]$ ,  $y \in [c, d]$  then  $|x - y| \leq \max\{|b - c|, |d - a|\}$ , and plugging in  $x = \mathbf{v}^T$ ,  $y = V^T(C)$ ,  $a =$   
 296  $\mathbf{v}^{T^-}$ ,  $b = \mathbf{v}^{T^+}$ ,  $c = V^{T^-}(C)$ ,  $d = V^{T^+}(C)$ .

297 This finishes the proof, by setting  $\varepsilon$  such that  $\varepsilon \cdot k = O\left(\sqrt{k(d \log k + \log(1/\delta))}\right)$ .  $\square$

## 298 4 Algorithms based on learning thresholds-policies

299 We next exemplify how one can use the above properties of thresholds-policies to design algorithms.  
 300 A natural algorithm would be to use the training set to learn a threshold-policy  $T$  that retains an  
 301 optimal solution with  $k$  items from the training set as specified in Theorem 6, and then use this online  
 302 policy to retain a subset of the  $n$  items in the first phase. Theorem 7 and Theorem 13 imply that with  
 303 probability  $1 - \delta$ , the number of retained items is at most  $m = k + O\left(\sqrt{kd \log(d) \log(n/k)} + k \log(1/\delta)\right)$   
 304 and that the value of the resulting solution is at least  $\text{OPT} - O\left(\sqrt{kd \log k + k \log(1/\delta)}\right)$ .

305 We can improve this algorithm by combining it with the greedy algorithm of Theorem 1 described  
 306 in Appendix A.1. During the first phase, we retain an item  $c$  only if (i)  $c$  is retained by  $T$ , and (ii)  
 307  $c$  participates in the optimal solution among the items that were retained thus far. Theorem 1 then  
 308 implies that out of these  $m$  items greedy keeps a subset of

$$O\left(k \log \frac{m}{k}\right) = O\left(k \left(\log \log \left(\frac{n}{k}\right) + \log \log \left(\frac{1}{\delta}\right)\right)\right).$$

309 items in expectation that still contains a solution of value at least  $\text{OPT} - O\left(\sqrt{kd \log k + k \log(1/\delta)}\right)$ .

310 We can further improve the value of the solution and guarantee that it will be optimal (with respect  
 311 to all  $n$  items) with probability  $1 - \delta$ . This is based on the observation that if the set of retained  
 312 items contains the top  $k$  items of each property  $P_i$  then it also contains an optimal solution. Thus, we  
 313 can compute a thresholds-policy  $T$  that retains the top  $k + O\left(\sqrt{k \log(d) \log(n/k)} + k \log(1/\delta)\right)$  items  
 314 of each property from the training set (if the training set does not have this many items with some  
 315 property then set the corresponding threshold to 0). Then, it follows from Theorem 8, that with  
 316 probability  $1 - \delta$ ,  $T$  will retain the top  $k$  items of each property in the first online phase and therefore  
 317 will retain an optimal solution. Now, Theorem 8 implies that with probability  $1 - \delta$  the total number  
 318 of items that are retained by  $T$  in real-time is at most  $m = dk + O\left(d \sqrt{k \log(d) \log(n/k)} + k \log(1/\delta)\right)$ .  
 319 By filtering the retained elements with the greedy algorithm of Theorem 1 as before it follows that  
 320 the total number of retained items is at most

$$k + k \log \left(\frac{m}{k}\right) = O\left(k \left(\log d + \log \log \left(\frac{n}{k}\right) + \log \log \left(\frac{1}{\delta}\right)\right)\right)$$

321 with probably  $1 - \delta$ . This proves Theorem 4.



## References

- M. Babaioff, N. Immorlica, and R. Kleinberg. Matroids, secretary problems, and online mechanisms. In *Proceedings of the eighteenth annual ACM-SIAM symposium on Discrete algorithms*, pages 434–443. Society for Industrial and Applied Mathematics, 2007.
- M. Balcan, T. Sandholm, and E. Vitercik. A general theory of sample complexity for multi-item profit maximization. In *EC*, pages 173–174. ACM, 2018.
- A. Blum, I. Caragiannis, N. Haghtalab, A. D. Procaccia, E. B. Procaccia, and R. Vaish. Opting into optimal matchings. In *SODA*, pages 2351–2363. SIAM, 2017.
- S. Boucheron, G. Lugosi, and P. Massart. *Concentration Inequalities: A Nonasymptotic Theory of Independence*. Oxford University Press, 2013. ISBN 9780191747106.
- O. Bousquet, U. von Luxburg, and G. Rätsch, editors. *Advanced Lectures on Machine Learning, ML Summer Schools 2003, Canberra, Australia, February 2-14, 2003, Tübingen, Germany, August 4-16, 2003, Revised Lectures*, volume 3176 of *Lecture Notes in Computer Science*, 2004. Springer.
- L. E. Celis, D. Straszak, and N. K. Vishnoi. Ranking with fairness constraints. *arXiv preprint arXiv:1704.06840*, 2017.
- L. E. Celis, L. Huang, and N. K. Vishnoi. Multiwinner voting with fairness constraints. In *IJCAI*, pages 144–151, 2018.
- T. Ezra, M. Feldman, and I. Nehama. Prophets and secretaries with overbooking. In *Proceedings of the 2018 ACM Conference on Economics and Computation*, pages 319–320. ACM, 2018.
- T. S. Ferguson. Who solved the secretary problem? *Statistical Science*, 4(3):282–289, 1989.
- S. Greenberg and M. Mohri. Tight lower bound on the probability of a binomial exceeding its expectation. *CoRR*, abs/1306.1433, 2013.
- A. Gupta and M. Molinaro. How the experts algorithm can help solve lps online. *Math. Oper. Res.*, 41(4):1404–1431, 2016.
- S. Har-Peled and M. Sharir. Relative  $(p, \epsilon)$ -approximations in geometry. *Discrete & Computational Geometry*, 45(3):462–496, 2011.
- J. Hsu, J. Morgenstern, R. M. Rogers, A. Roth, and R. Vohra. Do prices coordinate markets? In *STOC*, pages 440–453. ACM, 2016.
- E. L. Lawler. *Combinatorial optimization: networks and matroids*. Courier Corporation, 2001.
- C. McDiarmid. On the method of bounded differences. In *Surveys in Combinatorics 1989*. Cambridge University Press, Cambridge, 1989.
- A. Mehta et al. Online matching and ad allocation. *Foundations and Trends® in Theoretical Computer Science*, 8(4):265–368, 2013.
- S. Moran, M. Snir, and U. Manber. Applications of ramsey’s theorem to decision tree complexity. *Journal of the ACM (JACM)*, 32(4):938–949, 1985.
- J. Morgenstern and T. Roughgarden. On the pseudo-dimension of nearly optimal auctions. In *NIPS*, pages 136–144, 2015.
- J. Morgenstern and T. Roughgarden. Learning simple auctions. In *COLT*, volume 49 of *JMLR Workshop and Conference Proceedings*, pages 1298–1318. JMLR.org, 2016.
- N. Sauer. On the density of families of sets. *J. Combinatorial Theory Ser. A*, 13:145–147, 1972.
- M. Talagrand. Concentration of measure and isoperimetric inequalities in product spaces. *Publications Mathématiques de l’Institut des Hautes Etudes Scientifiques*, 81(1):73–205, 1995.
- R. van Handel. Probability in high dimension. Technical report, PRINCETON UNIV NJ, 2014.
- S. Vardi. The returning secretary. In *32nd International Symposium on Theoretical Aspects of Computer Science*, page 716, 2015.
- J. Vondrák. A note on concentration of submodular functions. *CoRR*, abs/1005.2791, 2010.

## A Deferred Proofs

### A.1 The Greedy Online Algorithm

A simple way to collect a small set of items that contains the optimal solution is to select the  $k$  largest items of each property. This set clearly contains the optimal solution. A simple argument, as in the proof of Lemma 18, shows that this implementation of the first stage keeps  $O(kd \log(n/k))$  items on average. In the following we present a *greedy algorithm* that retains an average number of  $O(k \log(k/\delta))$  items in the first phase (for a parameter  $\delta \in (0, 1)$ ).

The greedy algorithm works as follows: it ignores the first  $\delta n/k$  items<sup>2</sup> and then starts processing the items one by one. When we process the  $i$ 'th item,  $c_i$ , the algorithm computes the optimal solution  $M_i$  of the first  $i$  items (recall that we assume the algorithm has access to  $C_{\text{dummy}}$ , a large enough pool of zero valued items so there is always a feasible solution). The greedy algorithm retains  $c_i$  if and only if  $c_i$  participates in  $M_i$ . We assume that  $M_i$  is unique for every  $i$  (we can achieve this with an arbitrary consistent tie breaking rule, say among matchings of the same value we prefer the one that maximizes the sum of the indices of the matched items.). Since the optimal solutions correspond to maximum-weighted bipartite-matchings between the items and the constraints, we have the following lemma.

**Lemma 17.** *Suppose that the optimal solution, denoted by  $M$ , does not appear before round  $\delta n/k$ . Then it is a subset of the retained items.*

*Proof.* Let  $i \geq \delta n/k$ . Consider an item  $c$  matched by  $M$  and assume by contradiction that  $c$  is not matched in  $M_i$ . Consider  $Z = M \triangle M_i$  (we take the symmetric difference of  $M$  and  $M_i$  as sets of edges). Since  $M$  and  $M_i$  do not necessarily match the same items then the edges in  $Z$  induce a collection of alternating paths and cycles where each path  $L$  has an item matched by  $M$  and not by  $M_i$  at one end, and an item matched by  $M_i$  and not by  $M$  at the other hand. Except for its two ends, an alternating path contains items that are matched by both  $M$  and  $M_i$ . From the optimality and the uniqueness of  $M$  follows that for each path the value of  $M$  is larger than the value of  $M_i$ .

Since  $c$  is matched by  $M$  and not by  $M_i$  there is a path  $L$  in  $Z$  that starts at  $c$  and ends at some item that is matched by  $M_i$  and not by  $M$ .

It follows that all the items in  $L$  are in  $M_i$  and if we match them according to  $M$  then the value that we gain from them increases. This contradicts the optimality of  $M_i$ .

(Note that, in fact, there are no cycles in  $Z$ , since they will imply that there are multiple optimal solutions, contradicting the uniqueness of  $M_i$  and  $M$ .)  $\square$

Lemma 17 implies that, with high probability, if we collect all items that are in the optimal solution of the subset of items that precedes them then the set of items that we have at the end contains the optimal solution. Indeed, our algorithm fails if at least one of the items in the optimal solution  $M$  is among the first  $\delta n/k$  items. The probability that this occurs is at most  $\delta$  via a union bound and the fact that the probability that any fixed item in  $M$  is among the first  $\delta n/k$  items is exactly  $\delta/k$ .

The next question is: how large is the subset of the items which we retain? The next lemma answers this question in an average sense.

**Lemma 18.** *Assume that at the first stage the algorithm receives the items in a random order. Then the expected number of items that the first stage keeps is  $O(k \log \min \{ \frac{n}{k}, \frac{k}{\delta} \})$ .*

*Proof.* Let  $i \geq \delta n/k$  and denote  $X_i$  as an indicator that is one if and only if the  $i$ 'th item belongs to  $M_i$ . Condition the probability space on the set  $L_i$  of the first  $i$  items (but not on their order). Each element of  $L_i$  is equally likely to arrive last. So since  $|M_i| \leq k$ , then the probability that the element arriving last in  $L_i$  is in  $\text{OPT}_i$  is at most  $k/i$  if  $k < i$  or at most 1 otherwise. It follows that  $E[X_i | L_i] \leq \min \{ \frac{k}{i}, 1 \}$ . Since this holds for any  $L_i$ , it also holds unconditionally as well. Therefore, if  $\delta n/k < k$  then by the fact that  $\sum_{i=k+1}^n \frac{1}{i} \leq \log \frac{n}{k}$ , the expected number of retained items is

$$k - \frac{\delta n}{k} + \sum_{i=k+1}^n \frac{k}{i} = O\left(k \log \frac{n}{k}\right).$$

<sup>2</sup>We assume  $\delta n/k$  is an integer without loss of generality.

414 Similarly, if  $\delta n/k \geq k$  then the expected number of retained items is

$$\sum_{i=\delta n/k+1}^n \frac{k}{i} = O\left(k \log \frac{k}{\delta}\right). \quad \square$$

## 415 A.2 Generalization and concentration

416 **Technical notation.** For  $m \in \mathbb{N}$ , the set  $\{1, \dots, m\}$  is denoted by  $[m]$ . Given a family of sets  $F$  over  
 417 a domain  $X$ , and  $Y \subseteq X$ , the family  $\{f \cap Y : f \in F\}$  is denoted by  $F|_Y$ . Recall that the VC dimension  
 418 of  $F$  is the maximum size of  $Y \subseteq X$  such that  $F|_Y$  contains all subsets of  $Y$ .

419 **Lemma** (restatement of Lemma 9).  $VC(\mathcal{R}) = O(d \log d)$ .

420 *Proof.* Let  $S$  be a set of items shattered by  $\mathcal{R}$  and denote its size by  $m$ ; since  $S$  is arbitrary, an upper  
 421 bound on  $m$  implies an upper bound on  $VC(\mathcal{R})$ . To this end we upper bound the number of subsets  
 422 in  $\mathcal{R}|_S = \{S \cap R_T : R_T \in \mathcal{R}\}$ . Now, there are  $m$  items in  $S$  with at most  $m$  different values. Therefore,  
 423 we can restrict our attention to thresholds-policies where each threshold is picked from a fixed set of  
 424  $m+1$  meaningful locations (one location in between values of two consecutive items when we sort the  
 425 items by value). Thus  $|\mathcal{R}|_S| \leq (m+1)^d$ , but, as  $S$  is shattered,  $|\mathcal{R}|_S| = 2^m$  and we get  $m \leq d \log_2(m+1)$ .  
 426 This implies  $m = O(d \log d)$  from which we conclude that  $VC(\mathcal{R}) = O(d \log d)$ .  $\square$

427 **Lemma** (restatement of Lemma 10).  $VC(\mathcal{Q}) = O(\log d)$ .

428 *Proof.* For  $i \leq d$ , let  $\mathcal{Q}_i = \{R_i^T : T \in \mathcal{T}\}$ . Note that  $\mathcal{Q} = \cup_i \mathcal{Q}_i$ . We claim that  $VC(\mathcal{Q}_i) = 1$  for all  $i$ .  
 429 Indeed, let  $c', c''$  be two items. Note that if  $c' \notin P_i$  or  $c'' \notin P_i$  then  $\{c', c''\}$  is not contained by  $\mathcal{Q}_i$  and  
 430 therefore not shattered by it. Therefore, assume that  $c', c'' \in P_i$  and  $v_i(c') \geq v_i(c'')$ . Now, it follows  
 431 that any threshold  $T$  that retains  $c''$  must also retain  $c'$ , and so it follows that also in this case  $\{c', c''\}$   
 432 is not shattered.

433 The bound on the VC dimension of  $\mathcal{Q} = \cup_{i \leq d} \mathcal{Q}_i$  follows from the next lemma.

434 **Lemma 19.** Let  $m \geq 2$  and let  $F_1, \dots, F_m$  be classes with VC dimension at most 1. Then, the VC  
 435 dimension of  $\cup_i F_i$  is at most  $10 \log m$ .

436 *Proof.* We show that  $\cup_i F_i$  does not shatter a set of size  $10 \log m$ . Let  $Y \subseteq X$  of size  $10 \log m$ . Indeed,  
 437 by the Sauer's Lemma [Sauer, 1972]:

$$|(\cup_i F_i)|_Y| \leq m \left( \binom{10 \log m}{0} + \binom{10 \log m}{1} \right) = m(1 + 10 \log m) < m^{10} = 2^{10 \log m},$$

438 and therefore,  $Y$  is not shattered by  $\cup_i F_i$ .  $\square$

439 This finishes the proof of Lemma 10.  $\square$

440 **Lemma** (restatement of Lemma 16). There exists a collection of  $\mathcal{N}$  thresholds-policies such that  
 441  $|\mathcal{N}| \leq k^{O(d)}$ , and for every thresholds-policy  $T \in \mathcal{T}$  there are  $T^+, T^- \in \mathcal{N}$  such that

442 1.  $V^{T^-}(C) \leq V^T(C) \leq V^{T^+}(C)$  for every sample of items  $C$ . (By taking expectations this also  
 443 implies that  $\mathbf{v}^{T^-} \leq \mathbf{v}^T \leq \mathbf{v}^{T^+}$ .)

444 2.  $\mathbf{v}^{T^+} - \mathbf{v}^{T^-} \leq 10$ .

445 *Proof.* For every  $i \leq d$  and  $j \leq dn$  define thresholds  $t_i^j \in [0, 1]$  where  $t_i^0 = 1$  and for  $j > 0$  set  $t_i^j$  to  
 446 satisfy<sup>3</sup>

$$\Pr_{c \sim D} [v(c) \geq t_i^j \text{ and } c \in P_i] = \frac{j}{dn}.$$

447 Note that  $t_i^0 > t_i^1 > \dots$  (see Figure 1). Set

$$\mathcal{J}_i = \left\{ j : 0 \leq \frac{j}{dn} \leq \Pr_{c \sim D} [c \in P_i], j \in \mathbb{N} \right\},$$

<sup>3</sup>Such  $t_i^j$ 's exist due to our assumption that  $D$  is atomless (see Section 3).

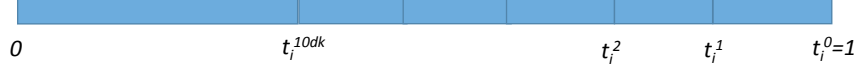

Figure 1: An illustration of the thresholds in  $\mathcal{N}_i$  as defined in the proof of Lemma 16. Each  $t_i^j$  for  $j \in \mathcal{J}_i$  satisfies  $\Pr_{c \sim D}[v(c) \geq t_i^j \text{ and } c \in P_i] = \frac{j}{dn}$ .

and define

$$\begin{aligned}\mathcal{N}_i &= \{t_i^j \mid j \in \mathcal{J}_i \cap \{0, 1, \dots, 10dk\}\} \cup \{0\} \\ \mathcal{N} &= \mathcal{N}_1 \times \mathcal{N}_2 \dots \times \mathcal{N}_d.\end{aligned}$$

Note that indeed  $|\mathcal{N}| \leq (10dk + 2)^{d+1} = k^{O(d)}$ .

We next show that  $\mathcal{N}$  satisfies items 1 and 2 in the statement of the lemma. Let  $T \in \mathcal{T}$  be an arbitrary thresholds-policy. The policies  $T^- = (t_i^-)_{i \leq d}$ , and  $T^+ = (t_i^+)_{i \leq d}$  are derived by rounding  $t$  in each coordinate up and down respectively, to the closest policies in  $\mathcal{N}$  (so, the thresholds in  $T^+$  are smaller than in  $T^-$ ; the “+” sign reflects that it retains more items and achieves a higher value). Formally,  $t_i^+ = \max\{t \in \mathcal{N}_i : t \leq t_i\}$  and  $t_i^- = \min\{t \in \mathcal{N}_i : t \geq t_i\}$  where  $t_i$  is the threshold for property  $i$  in  $T$ . Therefore, for every sample  $C \sim D^n$ , the set of items in  $C$  that are retained by  $T$  contains the set retained by  $T^-$  and is contained in the set retained by  $T^+$ . This implies item 1.

To derive item 2, observe that for every sample  $C$ :  $V^{T^+}(C) - V^{T^-}(C) \leq |Z|$ , where  $Z \subseteq C$  denotes the set of items which participate in some canonical optimal solution for  $T^+$  that are not retained by  $T^-$ . Thus, it suffices to show that  $\mathbb{E}[|Z|] \leq 10$ . To this end put  $p_i = \Pr_{c \sim D}[v(c) \geq t_i \text{ and } c \in P_i]$  and partition  $Z$  into two disjoint sets  $Z = E \cup F$ , where  $E$  is the set of all items  $c_j \in Z$  that are assigned by the optimal solution of  $T^+$  to a property  $P_i$  where  $p_i < \frac{10k}{n}$ , and  $F = Z \setminus E$ . We claim that

- $\mathbb{E}[|E|] \leq 1$ : for each  $P_i$  such that  $p_i < \frac{10k}{n}$  let  $G_i \subseteq P_i$  denote the set of items whose value  $v \in [t_i^+, t_i^-)$  (i.e. retained by  $T^+$  and not by  $T^-$ ). Note that  $E \subseteq \cup_i G_i$ , and that  $\Pr_{c \sim D}[c \in G_i] \leq \frac{1}{dn}$ . Thus, it follows that

$$\mathbb{E}_{C \sim D^n}[|E|] \leq \mathbb{E}_{C \sim D^n}[|\cup_i G_i|] \leq \sum_i \mathbb{E}_{C \sim D^n}[|G_i|] \leq d \cdot \frac{n}{dn} \leq 1.$$

- $\mathbb{E}[|F|] \leq 9$ : note that  $\mathbb{E}[|F|] \leq k \cdot \Pr[|F| > 0]$  (because  $F \subseteq Z$  and  $|Z| \leq k$ ). Thus, it suffices to show that  $\Pr[F > 0] \leq \frac{9}{k}$ . Indeed,  $F \neq \emptyset$  only if there is a property  $P_i$  with  $p_i \geq \frac{10k}{n}$  such that less than  $k$  items from  $P_i$  are retained by  $T^-$ . Fix a property  $P_i$  such that  $p_i \geq \frac{10k}{n}$  and let  $p_i^- = \Pr_{c \sim D}[v(c) \geq t_i^- \text{ and } c \in P_i]$ . Since  $p_i^- \geq \frac{10k}{n}$ , a multiplicative Chernoff bound yields that

$$\Pr_{C \sim D^n}[\text{less than } k \text{ items from } P_i \text{ are retained by } T^-] \leq \exp\left(-\frac{(9/10)^2}{2} 10k\right) \leq \frac{9}{k^2} \leq \frac{9}{dk},$$

and a union bound over all such properties  $P_i$  implies that  $\Pr[|F| > 0] \leq \frac{9d}{dk} \leq \frac{9}{k}$ .

Thus, it follows that  $v^{T^+} - v^{T^-} \leq 1 + k \cdot \frac{9}{k} = 10$ , which finishes the proof.

□

## B Lower Bounds

### B.1 Necessity of the training phase

Let  $n \in \mathbb{N}$  (sample size) and  $\delta \in [0, 1]$  (confidence parameter). In this section we focus on the case where there is no training phase and  $d = 1$ . Thus, we consider algorithms which get as an input a sequence  $v_1, \dots, v_n \in [0, 1]$  in an online manner (one after the other). In step  $m$  the algorithm needs to decide whether to retain  $v_m$  or to discard it (this decision may depend on the prefix  $v_1 \dots, v_m$ ). The algorithm is not allowed to discard a sample after it has been retained.

The following property captures the utility of the algorithm: *for every distribution  $\mu$  over  $[0, 1]$ , if  $v_1, \dots, v_n$  are sampled i.i.d from  $\mu$ , then with probability at least  $1 - \delta$ , the algorithm retains  $v_{j_1}, \dots, v_{j_k}$  that are the largest  $k$  elements in  $v_1, \dots, v_n$ .* The goal is to achieve this while minimizing the number of retained items in expectation.

**Theorem** (Theorem 2 restatement). *Let  $\delta \in (0, 1)$ . For every algorithm  $A$  which retains the maximal  $k$  elements with probability at least  $1 - \delta$ , there exists a distribution  $\mu$  such that the expected number of retained elements for input sequences  $v_1 \dots v_n \sim \mu^n$  is at least  $\Omega(k \log(\min\{n/k, k/\delta\}))$ .*

We remind that the bound is tight for the greedy algorithm (Theorem 1).

*Proof.* Following [Moran et al., 1985, Corollary 3.4], we may assume that  $A$  accesses its input only using comparisons. More precisely: call two sequences  $v_1, \dots, v_m$  and  $u_1, \dots, u_m$  *order-equivalent* if  $v_i \leq v_j \iff u_i \leq u_j$  for all  $i, j \leq m$ , and call the equivalence class of  $v_1 \dots v_m$  its *order-type*. Note that if  $v_1, \dots, v_m$  are distinct, then their order-type is naturally identified with a permutation  $\sigma \in \mathbb{S}_m$ . Call an algorithm  $A$  *order-invariant* if for every  $m \leq n$ , the decision<sup>4</sup> of  $A$  whether to retain  $v_m$  depends only on the order-type of  $v_1, \dots, v_m$  (equivalently,  $A$  accesses the input only using comparisons).

By Moran et al. [1985] it follows that for every algorithm  $A$  there is an infinite  $W \subseteq [0, 1]$  such that  $A$  is order-invariant when restricted to input sequences  $v_1, \dots, v_n \in W$ . For the remainder of the proof we fix such an infinite set  $W$  and focus only on inputs from  $W$ .

Set  $\mu$  to be a uniform distribution over a sufficiently large subset of  $W$  so that  $v_1 \dots v_n$  are distinct with probability  $1 - 1/n$ . Let  $\text{OPT}(S)$  denote the top  $k$  elements in  $S$ . Let  $T_m$  be the set of all sequences  $v_1, \dots, v_m, \dots, v_n \in W^n$  such that  $v_m \in \text{OPT}(\{v_1, \dots, v_m\})$ , and let  $p_k$  denote the probability that  $A$  retains  $v_m$  conditioned on the input being from  $T_m$ . Let  $T'_m \subseteq T_m$  denote the set of all sequences  $v_1, \dots, v_m, \dots, v_n$  such that  $v_m \in \text{OPT}(\{v_1, \dots, v_n\})$  (i.e.,  $v_m$  is part of the optimal solution). The proof hinges on the following lemma:

**Lemma 20.** *Since  $A$  is order based, for every  $m \leq n$ ,  $p_m$  is also the probability that  $A$  retains  $v_m$  conditioned on the input being from  $T'_m$ .*

*Proof.* The decision of  $A$  whether to retain  $v_m$  depends only on the order-type of  $v_1, \dots, v_m$ . For each  $\sigma \in \mathbb{S}_m$ , let  $E(\sigma)$  denote the event that the order type of  $v_1 \dots v_m$  is  $\sigma$ . Thus,

$$p_m = \Pr[A \text{ retains } v_m \mid T_m] = \sum_{\sigma \in \mathbb{S}_m} \Pr[E(\sigma) \mid T_m] \cdot \Pr[A \text{ retains } v_m \mid E(\sigma)],$$

and similarly

$$\Pr[A \text{ retains } v_m \mid T'_m] = \sum_{\sigma \in \mathbb{S}_m} \Pr[E(\sigma) \mid T'_m] \cdot \Pr[A \text{ retains } v_m \mid E(\sigma)].$$

Next, observe that for each order-type  $\sigma \in \mathbb{S}_m$ :

$$\Pr[E(\sigma) \mid T_m] = \Pr[E(\sigma) \mid T'_m] = \begin{cases} \frac{1}{m!}, & m \leq k \\ \frac{1}{k(m-1)!}, & v_m \in \text{OPT}(\{v_1, \dots, v_m\}), m > k \\ 0, & \text{otherwise.} \end{cases} \quad \square$$

<sup>4</sup>When  $A$  is randomized then the value of  $\Pr[A \text{ retains } v_k]$  depends only on the order-type of  $v_1 \dots v_m$ .

510 With the above lemma in hand, we can finish the proof. For the remainder of the argument, we  
 511 condition the probability space on the event that all elements in the sequence  $v_1, \dots, v_n$  are distinct  
 512 and show that conditioned on this event,  $A$  retains at least  $t = \Omega(\log(1/\delta))$  elements in expectation.  
 513 Note that this will conclude the proof since by the choice of  $\mu$  this event occurs with probability  
 514  $\geq 1 - 1/n$ , which implies that – unconditionally –  $A$  retains at least  $t - n \cdot (1/n) = t - 1 = \Omega(\log(1/\delta))$   
 515 elements in expectation.

516 For each  $m \leq n$ ,  $v_m$  is among the top  $k$  elements with probability  $\min\{1, k/m\}$ , in which case it is  
 517 retained with probability  $p_m$ . So  $A$  retains at least

$$\sum_{m=1}^n \min\left\{1, \frac{k}{m}\right\} \cdot p_m$$

518 elements in expectation. By the above lemma, the probability that  $A$  discards the maximum is

$$\sum_{m=1}^n \frac{k}{n} \cdot (1 - p_m),$$

519 which by assumption is smaller than  $\delta$ . So we obtain that  $\sum p_m \geq n(1 - \delta/k)$ . Thus, to minimize  
 520  $\sum_{m=1}^n \min\{1, k/m\} \cdot p_m$  subject to the constraint that  $\sum p_m \geq n(1 - \delta/k)$  we make the last  $n(1 - \delta/k)$   
 521  $p_m$ 's equal to 1 and the rest 0. This gives the desired lower bound.  $\square$

## 522 B.2 The algorithm from Theorem 4 is optimal

523 In the previous section we have presented an algorithm that with probability at least  $1 - \delta$  outputs an  
 524 optimal solution while retaining at most  $O(k(\log \log n + \log d + \log \log(1/\delta)))$  items in expectation  
 525 during the first phase.

526 We now present a proof of Theorem 5. We start with the following lemma that shows the dependence  
 527 on  $\delta$  cannot be improved in general, even for  $k = 1$ , when there are no constraints, and the distribution  
 528 over the items is known to the algorithm (so there is no need to train it on a sample from the  
 529 distribution):

530 **Lemma 21.** *Let  $v_1, \dots, v_n \in [0, 1]$  be drawn uniformly and independently, let  $e^{-n/2} < \delta < 1/10$  and*  
 531 *let  $A$  be an algorithm that retains the maximal value among the  $v_i$ 's with probability at least  $1 - \delta$ .*  
 532 *Then,*

$$\mathbb{E}x[|S|] = \Omega\left(\log \log \left(\frac{1}{\delta}\right)\right),$$

533 where  $S$  is the set of values retained by the algorithm.

534 Thus, it follows that for  $\delta = \text{poly}(1/n)$  and  $k, d = O(1)$  the bound in Theorem 4 is tight.

535 *Proof.* Define  $\alpha = \frac{\ln(1/\delta)}{2n} \in (1/n, 1/4)$ . Let  $E_t$  denote the event that  $v_t \geq 1 - \alpha$  and is the largest among  
 536  $v_1, \dots, v_t$ . We have that

$$\mathbb{E}x[|S|] \geq \sum_t \Pr[v_t \text{ is picked and } E_t] = \sum_t (\Pr[E_t] - \Pr[v_t \text{ is rejected and } E_t]) . \quad (3)$$

537 We show that since  $A$  errs with probability at most  $\delta$  then  $\sum_t \Pr[E_t \text{ and } v_t \text{ is rejected}]$  is small.

$$\begin{aligned} \delta &\geq \Pr[A \text{ rejects } v_{\max}] \geq \sum_t \Pr[A \text{ rejects } v_t \text{ and } E_t \text{ and } v_t = v_{\max}] \\ &= \sum_t \Pr[v_t = v_{\max} \mid A \text{ rejects } v_t \text{ and } E_t] \cdot \Pr[A \text{ rejects } v_t \text{ and } E_t] \\ &\geq \sum_t \Pr[v_i \leq 1 - \alpha \text{ for all } i > t \mid A \text{ rejects } v_t \text{ and } E_t] \cdot \Pr[A \text{ rejects } v_t \text{ and } E_t] \\ &= \sum_t \Pr[v_i \leq 1 - \alpha \text{ for all } i > t] \cdot \Pr[A \text{ rejects } v_t \text{ and } E_t] \end{aligned}$$

$$\begin{aligned} &\geq \sum_t (1 - \alpha)^{n-t} \cdot \Pr[A \text{ rejects } v_t \text{ and } E_t] \\ &\geq (1 - \alpha)^n \sum_t \Pr[A \text{ rejects } v_t \text{ and } E_t]. \end{aligned}$$

538 The crucial part of the above derivation is in third line. It replaces the event “ $v_t = v_{\max}$ ” by the event  
 539 “ $v_i \leq 1 - \alpha$  for all  $i > t$ ” (which is contained in the event “ $v_t = v_{\max}$ ” under the above conditioning).  
 540 The gain is that the events “ $v_i \leq 1 - \alpha$  for all  $i > t$ ” and “ $A$  rejects  $v_t$  and  $E_t$ ” are independent (the  
 541 first depends only on  $v_i$  for  $i > t$  and the latter on  $v_i$  for  $i \leq t$ ). This justifies the “=” in the fourth line.  
 542 Rearranging, we have  $\sum_t \Pr[A \text{ rejects } v_t \text{ and } E_t] \leq \frac{\delta}{(1-\alpha)^n}$ . Substituting this bound in Eq. (3),

$$\begin{aligned} \mathbb{E}[|S|] &\geq \sum_t \Pr[v_t \text{ is picked and } E_t] \\ &= \sum_t (\Pr[E_t] - \Pr[v_t \text{ is rejected and } E_t]) \\ &= \sum_t \Pr[E_t] - \frac{\delta}{(1-\alpha)^n} \\ &\geq \frac{1}{4} \ln(\alpha n) - \delta \cdot \exp(2\alpha n) && \text{(explained below)} \\ &= \frac{1}{4} \ln\left(\frac{\ln(1/\delta)}{2}\right) - \delta \exp(\ln(1/\delta)) && \text{(by the definition of } \alpha) \\ &= \frac{1}{4} \ln \ln(1/\delta) - \frac{1}{4} \ln 2 - 1 = \Omega(\log \log(1/\delta)), \end{aligned}$$

543 which is what we needed to prove. The last inequality follows because

- 544 (i)  $\sum_t \Pr[E_t] \geq \frac{1}{4} \ln(\alpha n)$  (as is explained next), and  
 545 (ii)  $1 - \alpha \geq \exp(-2\alpha)$  for every  $\alpha \in [0, \frac{1}{4}]$  (which can be verified using basic analysis).

546 To see (i), note that

$$\sum_t \Pr[E_t] = \mathbb{E}\left[\sum_t 1_{E_t}\right].$$

547 Let  $z = |\{t : v_t \geq 1 - \alpha\}|$ . Since the  $v_i$ ’s are uniform in  $[0, 1]$  then by the same argument as in the  
 548 proof of Lemma 18 we get that

$$\mathbb{E}\left[\sum_t 1_{E_t} \mid z\right] = \sum_{i=1}^z \frac{1}{i} \geq \int_1^{z+1} \frac{1}{x} = \ln(z+1),$$

549 and therefore

$$\mathbb{E}\left[\sum_t 1_{E_t}\right] = \mathbb{E}_z \mathbb{E}\left[\sum_t 1_{E_t} \mid z\right] \geq \mathbb{E}_z [\ln(z+1)].$$

550 Let  $Z \sim \text{Bin}(n, \alpha)$ , and therefore we need to lower bound  $\mathbb{E}[\ln(Z+1)]$  for  $Z \sim \text{Bin}(n, \alpha)$ . To this end,  
 551 we use the assumption that  $\alpha > 1/n$ , and therefore  $\Pr[Z \geq \alpha \cdot n] \geq 1/4$  (see Greenberg and Mohri, 2013  
 552 for a proof of this basic fact). In particular, this implies that  $\mathbb{E}[\ln(Z+1)] \geq \frac{1}{4} \ln(\alpha n + 1) > \frac{1}{4} \ln(\alpha n)$ ,  
 553 which finishes the proof.  $\square$

554 Lemma 21 implies Theorem 5 as follows: set  $k = d$ ,  $k_1 = \dots = k_d = 1$  and  $n \geq 100k \log(1/\delta)$ . Pick  
 555 a distribution  $D$  which is uniform over items, each satisfying exactly one of  $d$  properties, and with  
 556 value drawn uniformly from  $[0, 1]$ .

557 It suffices to show that with probability of at least  $1/3$ , the algorithm retains an expected number  
 558 of  $\Omega(\log \log(1/\delta))$  items from a constant fraction, say  $1/4$ , of the properties  $i$ . This follows from  
 559 Lemma 21 as we argue next. Let  $n_i$  denote the number of observed items of property  $i$ . Then, since  
 560  $\mathbb{E}[n_i] = n/d = n/k \geq 100$ , the multiplicative Chernoff bound implies that  $n_i \geq n/2k \geq 2 \log(1/\delta)$

561 with high probability (probability =  $1/2$  suffices). Therefore, the expected number of properties  $i$ 's for  
 562 which  $n_i \geq 2 \log(1/\delta)$  is at least  $k/2$ . Now, consider the random variable  $Y$  which counts for how many  
 563 properties  $i$  we have  $n_i \geq 2 \log(1/\delta)$ . Since  $Y$  is at most  $k$  and  $\mathbb{E}[Y] \geq k/2$ , then a simple averaging  
 564 argument implies that with probability of at least  $1/3$  we have that  $Y \geq k/4$ . Conditioning on this  
 565 event (which happens with probability  $\geq 1/3$ ), Lemma 21 implies<sup>5</sup> that  $\mathbb{E}[|S_i|] = \Omega(\log \log(1/\delta))$  for  
 566 each of these  $i$ 's.

---

<sup>5</sup>Note that to apply Lemma 21 on  $S_i$  we need  $\delta > e^{-n_i/2}$ , which is equivalent to  $n_i > 2 \ln(1/\delta)$ .
